# Supplementary material for: Identification of the novel FOXP3-dependent Treg cell transcription factor MEOX1 by high-dimensional analysis of human CD4+ T cells
Source: Front Immunol. 2023 Jul 25;14:1107397. doi: 10.3389/fimmu.2023.1107397 (PMC10407399; doi:10.3389/fimmu.2023.1107397)
Supplement: Supplementary file 2 [file Table_1.xlsx]

## Sheet: Sheet1
ID	Conditions	Number of Samples	Cluster	Purification method
1	Tconv-cell resting 0h	36	Tconv-cell resting	negative enrichment (RosetteSep)
2	Tconv-cell resting 8h	7	Tconv-cell act. CTLA-4	negative enrichment (RosetteSep)
3	Tconv-cell resting 12h	4	Tconv-cell TGF-b	negative enrichment (RosetteSep)
4	Tconv-cell resting 18h	2	Tconv-cell TGF-b	negative enrichment (RosetteSep)
5	Tconv-cell resting 19h	3	Tconv-cell TGF-b	negative enrichment (RosetteSep)
6	Tconv-cell resting 20h	6	Tconv-cell TGF-b	negative enrichment (RosetteSep)
7	Tconv-cell resting 26h	3	Tconv-cell TGF-b	negative enrichment (RosetteSep)
8	Tconv-cell resting 6h pEP	10	Tconv-cell resting	positive enrichment (Miltenyi)
9	Tconv-cell resting 24h pEP	3	Tconv-cell resting	positive enrichment (Miltenyi)
10	Tconv-cell CD3	4	Tconv-cell act. CTLA-4	negative enrichment (RosetteSep)
11	Tconv-cell 18h TGF-β (10ng)	2	Tconv-cell TGF-b	negative enrichment (RosetteSep)
12	Tconv-cell 20h TGF-β (10ng)	4	Tconv-cell TGF-b	negative enrichment (RosetteSep)
13	Tconv-cell 20h TGF-β (1ng)	4	Tconv-cell TGF-b	negative enrichment (RosetteSep)
14	Tconv-cell 18h+1h TGF-β (10ng)	3	Tconv-cell TGF-b	negative enrichment (RosetteSep)
15	Tconv-cell 18h+2h TGF-β (10ng)	3	Tconv-cell TGF-b	negative enrichment (RosetteSep)
16	Tconv-cell l 18h+8h TGF-β (10ng)	3	Tconv-cell TGF-b	negative enrichment (RosetteSep)
17	Tconv-cell TGF-β (10ng) + 160nM LY	4	Tconv-cell TGF-b	negative enrichment (RosetteSep)
18	Tconv-cell TGF-β (10ng) + 160nM SB	4	Tconv-cell TGF-b	negative enrichment (RosetteSep)
19	Tconv-cell TGF-β (10ng) + 2560nM LY	4	Tconv-cell TGF-b	negative enrichment (RosetteSep)
20	Tconv-cell TGF-β (10ng) + 2560nM SB	4	Tconv-cell TGF-b	negative enrichment (RosetteSep)
21	Tconv-cell CD3/IL-2	7	Tconv-cell CD3/IL-2	flow sorting
22	Tconv-cell CD3/CD28 8h	4	Tconv-cell act. 8h	negative enrichment (RosetteSep)
23	Tconv-cell CD3/CD28 20h	4	Tconv-cell act. 20h	negative enrichment (RosetteSep)
24	Tconv-cell CD3/CD28 + IL-10 8h	4	Tconv-cell act. 8h	negative enrichment (RosetteSep)
25	Tconv-cell CD3/CD28 + IL-10 20h	3	Tconv-cell act. 20h	negative enrichment (RosetteSep)
26	Tconv-cell CD3/CD28 + VEGF 8h	4	Tconv-cell act. 8h	negative enrichment (RosetteSep)
27	Tconv-cell CD3/CD28 + VEGF 20h	3	Tconv-cell act. 20h	negative enrichment (RosetteSep)
28	Tconv-cell CD3/CD28 + TGF-β (10ng) 8h	4	Tconv-cell act. 8h	negative enrichment (RosetteSep)
29	Tconv-cell CD3/CD28 + TGF-β (10ng) 20h	4	Tconv-cell act. 20h	negative enrichment (RosetteSep)
30	Tconv-cell CD3/CD28 + TGF-β (10ng) + 160nM LY	4	Tconv-cell act. 20h	negative enrichment (RosetteSep)
31	Tconv-cell CD3/CD28 + TGF-β (10ng) + 160nM SB	4	Tconv-cell act. 20h	negative enrichment (RosetteSep)
32	Tconv-cell CD3/CD28 + TGF-β (10ng) + 2560nM LY	3	Tconv-cell act. 20h	negative enrichment (RosetteSep)
33	Tconv-cell CD3/CD28 + TGF-β (10ng) + 2560nM SB	2	Tconv-cell act. 20h	negative enrichment (RosetteSep)
34	Tconv-cell CD3/CD28 + CTLA-4	4	Tconv-cell act. CTLA-4	negative enrichment (RosetteSep)
35	Tconv-cell CD3/CD28 + PD-1	4	Tconv-cell act. PD-1	negative enrichment (RosetteSep)
36	Tconv-cell CD3/CD28 + PGE2	4	Tconv-cell act. PGE2	negative enrichment (RosetteSep)
37	Tconv-cell TH1-diff. 24h	2	TH1-/TH2-cell	positive enrichment (Dynal)
38	Tconv-cell TH1-diff. 48h	2	TH1-/TH2-cell	positive enrichment (Dynal)
39	Tconv-cell TH2-diff. 24h	2	TH1-/TH2-cell	positive enrichment (Dynal)
40	Tconv-cell TH2-diff. 48h	2	TH1-/TH2-cell	positive enrichment (Dynal)
41	Tconv-cell TH1-diff. 24h + SATB1 siRNA	2	TH1-/TH2-cell	positive enrichment (Dynal)
42	Tconv-cell TH1-diff. 48h + SATB1 siRNA	2	TH1-/TH2-cell	positive enrichment (Dynal)
43	Tconv-cell TH2-diff. 24h + SATB1 siRNA	2	TH1-/TH2-cell	positive enrichment (Dynal)
44	Tconv-cell TH2-diff. 48h + SATB1 siRNA	2	TH1-/TH2-cell	positive enrichment (Dynal)
45	Tconv-cell + SATB1 siRNA	2	Tconv-cell resting	positive enrichment (Dynal)
46	Treg-cell resting	15	Treg-cell resting	flow sorting
47	Treg-cell resting 6h pEP	2	Treg-cell resting	positive enrichment (Miltenyi)
48	Treg-cell CD3/IL-2	7	Treg-cell CD3/IL-2	flow sorting
